# Supplementary material for: Scanning of Transposable Elements and Analyzing Expression of Transposase Genes of Sweet Potato [Ipomoea batatas]
Source: PLoS One. 2014 Mar 7;9(3):e90895. doi: 10.1371/journal.pone.0090895 (PMC3946583; doi:10.1371/journal.pone.0090895)
Supplement: Table S2 — Bioinformatics analyses of 16 transposase genes. (XLS) [file pone.0090895.s003.xls]

## Sheet: Sheet1
Table S2. Bioinformatics analyses of 16 transposase genes
Gene name	Classification	Length of sequence (bp)	Length of ORF (bp)	Base composition	Molecular weight of nucleic acid	Length of protein (Aa)	Molecular weight of protein (kDa)	Isoelectric point
Ib_DTP_11286	PIF	1731	1176	28.7%A;19.8%C;21.1%G;30.4%T;	ssDNA:534.72 dsDNA: 1067.00	391	44893.3	pI=5.31
Ib_DTM_5847	Mutator	2307	1662	31.4%A;19.4%C;20.0%G;29.2%T;	ssDNA:712.70 dsDNA: 1422.02	553	63535.1	pI=7.10
Ib_DTP_9943	PIF	1839	1332	23.7%A;26.3%C;21.6%G;28.4%T;	ssDNA:565.66 dsDNA: 1133.70	443	49331.1	pI=8.53
Ib_DTM_1664	Mutator	3450	2538	32.6%A;17.5%C;24.2%G;25.7%T;	ssDNA:1070.70 dsDNA: 2126.64	845	96867.3	pI=6.22
Ib_DTM _FAR11812	Mutator	3374	2475	30.8%A;18.0%C;22.8%G;28.5%T;	ssDNA:1048.30 dsDNA: 2085.93	824	94714.1	pI=7.43
Ib_DTM _FAR14362	Mutator	2571	2076	30.7%A;17.4%C;21.8%G;30.1%T;	ssDNA:799.07 dsDNA: 1590.91	691	80421.1	pI=7.01
Ib_DTM _PB12217	Mutator	3203	2238	26.4%A;20.4%C;22.9%G;30.3%T;	ssDNA:989.86 dsDNA: 1974.44	745	84620.1	pI=6.16
Ib_DTM _PB1 4635	Mutator	2518	1752	27.5%A;20.7%C;23.0%G;28.8%T;	ssDNA:778.40 dsDNA: 1552.19	583	66446.4	pI=8.26
Ib_DTH_1235	hAT	3718	2712	31.0%A;18.3%C;22.9%G;27.6%T;	ssDNA:1154.82 dsDNA: 2297.99	903	104078	pI=6.66
Ib_DU_2831	Unclassified	2971	2367	28.9%A;21.5%C;22.9%G;26.8%T;	ssDNA:918.30 dsDNA: 1831.45	788	89115.5	pI=5.69
Ib_DTM_2890	Mutator	2950	2001	30.0%A;18.0%C;22.6%G;29.4%T;	ssDNA:916.56 dsDNA: 1824.56	666	77426.9	pI=6.73
Ib_DTM_1770	Mutator	3391	2601	29.4%A;20.0%C;21.6%G;29.0%T;	ssDNA:1047.95 dsDNA: 2090.27	866	98206.9	pI=6.83
Ib_DTM _FAR14118	Mutator	2625	2082	29.4%A;17.6%C;23.3%G;29.8%T;	ssDNA:816.40 dsDNA: 1624.24	693	79855.4	pI=6.50
Ib_DTH_1962	hAT	3305	2043	29.8%A;20.1%C;23.4%G;26.7%T;	ssDNA:1022.94 dsDNA: 2037.3	680	76859.4	pI=6.94
Ib_DTM_3260	Mutator	2841	2313	27.7%A;22.6%C;22.3%G;27.5%T;	ssDNA:876.93 dsDNA: 1751.33	770	86874.3	pI=6.67
Ib_DTM_3282	Mutator	2834	2361	27.9%A;19.9%C;23.6%G;28.6%T;	ssDNA:880.00 dsDNA: 1753.15	786	89958.1	pI=6.39
